# Supplementary material for: SiO2 aerogel monolith allows ultralow amounts of TiO2 for the fast and efficient removal of gaseous pollutants
Source: Royal Society of Chemistry journal article supplement (doi:10.1039/c8dt02557f), 2018-01-01
Supplement: c8dt02557f1.pdf [file c8dt02557f1.pdf]

## Supporting Information

### **SiO<sub>2</sub> aerogel monolith allows ultralow amounts of TiO<sub>2</sub> for fast and efficient removal of gaseous pollutants**

Fangxu Wan, Changhua Wang\*, Yonghua Han, Lina Kong, Jingyu Yan,  
Xintong Zhang\* and Yichun Liu

Center for Advanced Optoelectronic Functional Materials Research, and Key  
Laboratory of UV-Emitting Materials and Technology of Ministry of Education,  
Northeast Normal University, 5268 RenminStreet, Changchun 130024, China

\*E-mail: [wangch100@nenu.edu.cn](mailto:wangch100@nenu.edu.cn); [xtzhang@nenu.edu.cn](mailto:xtzhang@nenu.edu.cn); Fax: +86 431 85099772;

Tel: +8643185099772

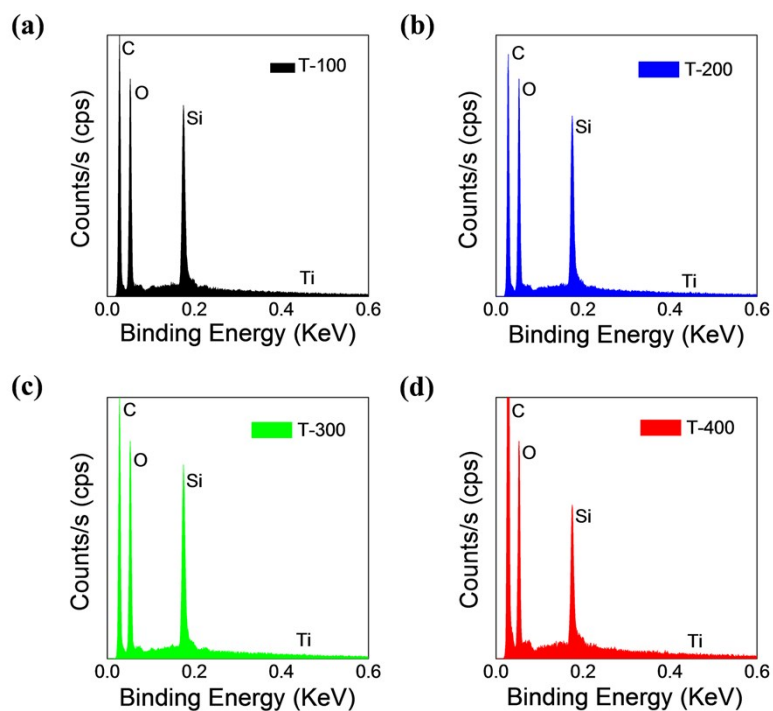

**Figure S1.** Representative EDAX diagrams of  $\text{TiO}_2\text{-SiO}_2$  aerogel monolith. The  $\text{TiO}_2\text{-SiO}_2$  aerogel monolith were expressed as T-n (n represented for the cycle times which varied from 100 to 400 cycles) (a) T-100; (b) T-200; (c) T-300; (d) T-400.

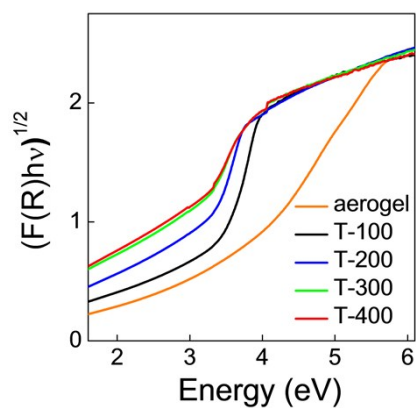

**Figure S2.** Tauc-plot for samples aerogel and T-n.
